# Supplementary material for: A miRNome analysis at the early postmortem interval
Source: PeerJ. 2023 Jun 7;11:e15409. doi: 10.7717/peerj.15409 (PMC10257396; doi:10.7717/peerj.15409)
Supplement: Supplemental Information 6 [file peerj-11-15409-s006.xlsx]

## Sheet: Hoja1
Transcript ID	Probe Set ID	Fold Change	24 Avg (log2)	24 Standard Deviation	Control Avg (log2)	Control Standard Deviation	P-val	FDR P-val	Target Gene Database	Probe Set Name	Array Name
rno-miR-139-5p	20501464	-160.08	0.88	0.27	8.21	0.31	9.97e-11	6.23e-08	microcosm; MTI	MIMAT0000845_st	miRNA-4_0
rno-miR-532-3p	20506543	-36.3	2.91	1.48	8.09	0.32	6.87e-05	0.0007	microcosm	MIMAT0005323_st	miRNA-4_0
rno-miR-342-3p	20500994	-33.74	2.76	1.48	7.84	0.36	0.0001	0.001	microcosm; MTI	MIMAT0000589_st	miRNA-4_0
rno-miR-433-3p	20502443	-29.16	2.7	1.24	7.57	0.43	4.3e-05	0.0005	microcosm	MIMAT0001628_st	miRNA-4_0
rno-miR-328a-3p	20500950	-23.1	3.13	2.37	7.66	0.54	0.0028	0.0084	microcosm; miRecords; MTI	MIMAT0000564_st	miRNA-4_0
rno-miR-339-5p	20500982	-17.44	1.3	0.89	5.42	0.71	4.42e-05	0.0006	microcosm	MIMAT0000583_st	miRNA-4_0
rno-miR-455-3p	20506533	-16.11	2.34	0.85	6.35	0.54	1.5e-05	0.0003		MIMAT0017308_st	miRNA-4_0
rno-miR-222-3p	20501555	-15.57	1.68	1.21	5.64	0.45	0.0001	0.0011	microcosm; MTI; miRecords	MIMAT0000891_st	miRNA-4_0
rno-miR-431	20502439	-15.38	2.04	1.43	5.98	0.16	0.0006	0.003	microcosm	MIMAT0001626_st	miRNA-4_0
rno-mir-423	20535731	-14.41	0.99	0.62	4.84	0.35	2.17e-06	7.54e-05		MI0006145_st	miRNA-4_0
rno-miR-423-3p	20506527	-14.39	2.77	1.38	6.62	0.48	0.0005	0.0027	microcosm	MIMAT0005313_st	miRNA-4_0
rno-miR-299b-5p	20517097	-14.01	0.98	0.53	4.79	1.3	0.0005	0.0028		MIMAT0017833_st	miRNA-4_0
rno-miR-299a-5p	20501568	-12.76	2.86	1.8	6.53	0.46	0.0012	0.0048	microcosm	MIMAT0000901_st	miRNA-4_0
rno-miR-92a-3p /// rno-miR-92a-3p	20501405	-11.53	6.04	2.88	9.56	0.49	0.0039	0.0107	microcosm; MTI; miRecords	MIMAT0000816_st	miRNA-4_0
rno-miR-6216	20524324	-11.27	8.74	0.6	12.23	0.13	1.31e-06	4.9e-05		MIMAT0024856_st	miRNA-4_0
rno-miR-674-3p	20506552	-11.05	1.98	0.91	5.45	0.74	8.41e-05	0.0009	microcosm	MIMAT0005330_st	miRNA-4_0
rno-miR-106b-3p	20501425	-10.95	2.41	1.4	5.86	0.26	0.0007	0.0034	microcosm	MIMAT0004727_st	miRNA-4_0
rno-miR-485-5p	20504254	-10.22	1.33	0.71	4.68	0.73	4.86e-05	0.0006	microcosm; miRecords; MTI	MIMAT0003203_st	miRNA-4_0
rno-miR-708-5p	20506553	-9.84	0.91	0.75	4.21	0.63	0.0001	0.001	microcosm	MIMAT0005331_st	miRNA-4_0
rno-miR-501-3p	20504138	-9.67	2.06	0.68	5.34	0.84	6.31e-05	0.0007		MIMAT0017198_st	miRNA-4_0
rno-miR-345-5p	20501002	-9.61	2.35	1.34	5.61	0.7	0.0029	0.0086	microcosm	MIMAT0000594_st	miRNA-4_0
rno-miR-351-5p	20501020	-9.19	5.81	1.24	9.01	0.22	0.0003	0.0017	microcosm	MIMAT0000608_st	miRNA-4_0
rno-miR-667-3p	20513758	-8.85	1.16	0.15	4.31	0.81	2.42e-05	0.0004		MIMAT0012852_st	miRNA-4_0
rno-miR-409a-5p	20504256	-8.68	1.33	1.08	4.45	0.37	0.0003	0.002	microcosm	MIMAT0003204_st	miRNA-4_0
rno-miR-425-5p	20506528	-8.4	3.85	1.8	6.92	0.36	0.0066	0.0157	microcosm	MIMAT0005314_st	miRNA-4_0
rno-miR-487b-3p	20504251	-8.26	4.72	2.39	7.76	0.21	0.0088	0.0196	microcosm	MIMAT0003200_st	miRNA-4_0
rno-miR-99b-5p	20501415	-8.1	6.51	2.27	9.53	0.26	0.0068	0.0162	microcosm; MTI	MIMAT0000821_st	miRNA-4_0
rno-miR-539-5p	20504210	-7.99	2.49	1.37	5.49	0.91	0.0068	0.0161	microcosm	MIMAT0003176_st	miRNA-4_0
rno-miR-329-3p	20500954	-7.76	4.8	2.15	7.76	0.31	0.0062	0.0151	microcosm	MIMAT0000566_st	miRNA-4_0
rno-miR-505-5p	20504487	-7.7	1.67	0.95	4.61	0.5	0.0002	0.0014		MIMAT0017226_st	miRNA-4_0
rno-miR-181d-5p	20506505	-7.6	2.41	0.65	5.34	0.52	0.0001	0.001	microcosm	MIMAT0005299_st	miRNA-4_0
rno-miR-503-3p	20504267	-7.11	1.57	0.65	4.4	0.31	2.34e-05	0.0004		MIMAT0017224_st	miRNA-4_0
rno-miR-154-5p	20501484	-6.97	1.37	0.81	4.17	0.51	0.0001	0.001	microcosm	MIMAT0000856_st	miRNA-4_0
rno-miR-542-5p	20504214	-6.94	3.46	1.69	6.25	0.37	0.0037	0.0103	microcosm	MIMAT0003178_st	miRNA-4_0
rno-miR-541-5p	20504212	-6.78	5.57	2.45	8.33	0.34	0.0099	0.0212	microcosm	MIMAT0003177_st	miRNA-4_0
rno-miR-652-3p	20506572	-6.57	5.03	1.82	7.75	0.38	0.0055	0.0139	microcosm; MTI	MIMAT0005342_st	miRNA-4_0
rno-miR-151-3p	20501030	-6.53	5.31	1.86	8.02	0.39	0.0056	0.0141		MIMAT0000614_st	miRNA-4_0
rno-miR-331-3p	20500962	-6.2	0.47	0.06	3.1	0.84	0.0002	0.0013	microcosm; MTI	MIMAT0000570_st	miRNA-4_0
rno-miR-350	20501015	-5.9	1.55	0.79	4.11	0.26	0.0001	0.001	microcosm; MTI	MIMAT0000604_st	miRNA-4_0
rno-miR-125b-2-3p	20501436	-5.8	3.19	1.11	5.73	0.5	0.0011	0.0043		MIMAT0026467_st	miRNA-4_0
rno-miR-300-3p	20501571	-5.52	1.39	0.76	3.86	0.21	0.0001	0.001	microcosm	MIMAT0000902_st	miRNA-4_0
rno-miR-504	20513725	-5.34	1.33	0.34	3.75	0.56	8.83e-06	0.0002		MIMAT0012830_st	miRNA-4_0
rno-miR-127-3p	20501440	-5.28	7.56	1.28	9.96	0.12	0.0014	0.0051	microcosm; MTI	MIMAT0000833_st	miRNA-4_0
rno-miR-674-5p	20506551	-5.11	5.74	1.21	8.1	0.44	0.0027	0.0082	microcosm	MIMAT0005329_st	miRNA-4_0
rno-miR-134-5p	20501453	-5.1	4.06	0.36	6.41	0.27	1.51e-06	5.38e-05	microcosm; MTI; miRecords	MIMAT0000840_st	miRNA-4_0
rno-miR-337-3p	20500971	-5.06	1.82	0.24	4.16	0.97	0.0012	0.0047	microcosm	MIMAT0000577_st	miRNA-4_0
rno-let-7d-3p	20500948	-5	2.65	0.99	4.97	1.12	0.0051	0.0133	microcosm; MTI	MIMAT0000563_st	miRNA-4_0
rno-mir-139	20535003	-4.84	2.05	0.57	4.33	0.13	2.69e-05	0.0004		MI0000913_st	miRNA-4_0
rno-miR-322-3p	20500925	-4.71	2.05	1.06	4.29	0.29	0.0016	0.0057	microcosm	MIMAT0000547_st	miRNA-4_0
rno-miR-362-5p	20513721	-4.53	3.54	1.47	5.72	0.57	0.0051	0.0132		MIMAT0012828_st	miRNA-4_0
rno-miR-138-5p /// rno-miR-138-5p	20501461	-4.32	1.23	0.75	3.34	0.84	0.0055	0.0139	microcosm; MTI	MIMAT0000844_st	miRNA-4_0
rno-miR-320-3p	20501573	-4.3	8.04	0.35	10.14	0.53	6.28e-05	0.0007	microcosm; MTI; miRecords	MIMAT0000903_st	miRNA-4_0
rno-miR-133b-3p	20504157	-4.21	10.42	0.95	12.49	0.27	0.0014	0.0051	microcosm; MTI; miRecords	MIMAT0003126_st	miRNA-4_0
rno-miR-324-5p	20500934	-3.99	3.43	1.27	5.42	0.48	0.0073	0.0171	microcosm; MTI	MIMAT0000553_st	miRNA-4_0
rno-miR-191a-5p	20501504	-3.94	9.75	1.29	11.72	0.17	0.0032	0.0094	microcosm	MIMAT0000866_st	miRNA-4_0
rno-miR-665	20513744	-3.92	3.08	0.44	5.05	0.48	0.0001	0.0011		MIMAT0012844_st	miRNA-4_0
rno-miR-221-3p	20501553	-3.88	4.4	1.38	6.35	0.42	0.0094	0.0204	microcosm; MTI; miRecords	MIMAT0000890_st	miRNA-4_0
rno-miR-540-3p	20504207	-3.84	1.16	0.33	3.1	0.75	0.0006	0.003	microcosm	MIMAT0003174_st	miRNA-4_0
rno-miR-133a-3p	20501452	-3.69	11.31	0.91	13.2	0.24	0.0021	0.0071	microcosm; miRecords; MTI	MIMAT0000839_st	miRNA-4_0
rno-miR-10b-5p	20501336	-3.54	1.53	0.53	3.35	0.51	0.0001	0.001	microcosm; MTI	MIMAT0000783_st	miRNA-4_0
rno-miR-23b-5p	20501357	-3.51	0.47	0.04	2.28	0.88	0.0005	0.0028		MIMAT0017099_st	miRNA-4_0
rno-miR-125b-5p /// rno-miR-125b-5p	20501434	-3.43	10.42	1.39	12.2	0.18	0.0058	0.0144	microcosm; MTI	MIMAT0000830_st	miRNA-4_0
rno-miR-369-5p	20504258	-3.2	0.54	0.55	2.22	0.84	0.0071	0.0167	microcosm	MIMAT0003206_st	miRNA-4_0
rno-miR-339-3p	20500983	-3.04	0.93	0.34	2.53	0.52	0.0003	0.002	microcosm	MIMAT0004648_st	miRNA-4_0
rno-miR-409a-3p	20504257	-2.86	1.32	0.14	2.84	0.76	0.0004	0.0023	microcosm; MTI	MIMAT0003205_st	miRNA-4_0
rno-miR-495	20506539	-2.83	0.79	0.54	2.29	0.55	0.0055	0.0139	microcosm	MIMAT0005320_st	miRNA-4_0
rno-miR-25-5p	20501362	-2.77	4.27	0.33	5.74	0.43	0.0003	0.0018	microcosm	MIMAT0004713_st	miRNA-4_0
rno-miR-378a-5p	20504485	-2.69	8.28	0.69	9.71	0.31	0.0033	0.0094	microcosm; MTI	MIMAT0003378_st	miRNA-4_0
rno-miR-381-5p	20504248	-2.67	1	0.32	2.42	1.16	0.0077	0.0179		MIMAT0017220_st	miRNA-4_0
rno-miR-127-5p	20501439	-2.58	1.25	0.44	2.62	0.59	0.0007	0.0033		MIMAT0017117_st	miRNA-4_0
rno-miR-379-3p	20504239	-2.48	0.74	0.46	2.05	0.38	0.0019	0.0063	microcosm	MIMAT0004791_st	miRNA-4_0
rno-miR-434-5p	20506530	-2.48	0.64	0.26	1.95	0.2	2.94e-05	0.0004		MIMAT0017307_st	miRNA-4_0
rno-miR-181c-5p	20501486	-2.44	1.05	0.6	2.33	0.23	0.002	0.0068	microcosm; MTI	MIMAT0000857_st	miRNA-4_0
rno-miR-26b-5p	20501366	-2.43	1.35	0.69	2.63	0.32	0.003	0.009	microcosm; MTI	MIMAT0000797_st	miRNA-4_0
rno-miR-351-3p	20501021	-2.41	1.93	0.36	3.2	0.41	0.0011	0.0044		MIMAT0017041_st	miRNA-4_0
rno-miR-22-3p	20501354	-2.38	10.06	0.75	11.31	0.23	0.0032	0.0093	microcosm	MIMAT0000791_st	miRNA-4_0
rno-miR-299a-3p	20501569	-2.33	0.78	0.02	2	0.57	0.0008	0.0036		MIMAT0017167_st	miRNA-4_0
rno-miR-377-3p	20504151	-2.24	0.93	0.37	2.09	0.65	0.0083	0.0188	microcosm	MIMAT0003123_st	miRNA-4_0
rno-miR-326-3p	20500945	-2.16	0.34	0.09	1.45	0.27	1.04e-05	0.0002	microcosm	MIMAT0000560_st	miRNA-4_0
rno-miR-140-5p	20500965	-2.15	0.47	0.37	1.58	0.43	0.0023	0.0075	microcosm; MTI	MIMAT0000573_st	miRNA-4_0
rno-miR-210-5p	20501533	-2.07	0.6	0.1	1.65	0.36	9.29e-05	0.0009		MIMAT0017156_st	miRNA-4_0
rno-miR-93-5p	20501407	-2.05	7	0.14	8.03	0.16	1e-05	0.0002	microcosm; MTI	MIMAT0000817_st	miRNA-4_0
rno-miR-17-1-3p	20501343	-2.02	1.64	0.4	2.65	0.57	0.0087	0.0195	microcosm	MIMAT0004710_st	miRNA-4_0
rno-miR-543-3p	20504209	-2.01	0.34	0.12	1.35	0.38	0.0002	0.0015	microcosm	MIMAT0003175_st	miRNA-4_0
rno-mir-494	20535276	2.05	1.97	0.38	0.93	0.19	0.0023	0.0075		MI0003542_st	miRNA-4_0
rno-miR-103-1-5p	20501423	2.17	1.82	0.08	0.71	0.08	4.69e-08	3.45e-06		MIMAT0017114_st	miRNA-4_0
rno-mir-466b-2	20535701	2.19	1.84	0.16	0.7	0.09	1.17e-06	4.56e-05		MI0006113_x_st	miRNA-4_0
rno-miR-666-5p	20513762	2.25	2.64	0.47	1.47	0.33	0.002	0.0068		MIMAT0012855_st	miRNA-4_0
rno-miR-383-5p	20504134	2.27	1.82	0.63	0.64	0.19	0.0045	0.012	microcosm; MTI; miRecords	MIMAT0003114_st	miRNA-4_0
rno-miR-6332	20524615	2.32	2	0.13	0.79	0.09	3.47e-07	1.68e-05		MIMAT0025073_st	miRNA-4_0
rno-miR-298-5p	20501566	2.38	2.61	0.28	1.35	0.37	0.0005	0.0028	microcosm; MTI	MIMAT0000900_st	miRNA-4_0
rno-miR-16-3p	20501341	2.49	1.82	0	0.51	0.07	1.11e-09	4.62e-07		MIMAT0017094_st	miRNA-4_0
rno-miR-204-3p	20501527	2.72	2.84	0.9	1.39	0.46	0.0051	0.0132	microcosm	MIMAT0004739_st	miRNA-4_0
rno-mir-346	20534730	2.91	2.33	0.08	0.79	0.22	3.68e-07	1.68e-05		MI0000633_st	miRNA-4_0
rno-miR-874-3p	20506488	3.05	3.12	0.55	1.51	0.27	0.0003	0.0019	microcosm	MIMAT0005284_st	miRNA-4_0
rno-miR-188-5p	20506508	3.27	3.26	0.38	1.55	0.28	2.59e-05	0.0004	microcosm	MIMAT0005301_st	miRNA-4_0
rno-miR-6316	20524595	3.43	2.39	0.51	0.62	0.24	9.36e-05	0.0009		MIMAT0025053_st	miRNA-4_0
rno-miR-331-5p	20500961	3.45	2.4	0.58	0.62	0.08	0.0001	0.001		MIMAT0017033_st	miRNA-4_0
rno-miR-211-3p	20501536	3.49	3.25	0.55	1.44	0.3	0.0004	0.0023		MIMAT0017157_st	miRNA-4_0
rno-miR-370-3p	20504149	3.53	3.15	0.42	1.33	0.13	1.18e-05	0.0003	microcosm	MIMAT0003122_st	miRNA-4_0
rno-mir-22	20534928	3.7	2.73	0.46	0.84	0.1	2.47e-05	0.0004		MI0000851_st	miRNA-4_0
rno-mir-99b	20534967	3.73	2.83	0.63	0.93	0.28	0.0002	0.0013		MI0000884_st	miRNA-4_0
rno-mir-297	20535061	3.84	2.47	0.37	0.53	0.07	1.13e-05	0.0003		MI0000968_st	miRNA-4_0
rno-miR-615	20513732	3.99	2.77	0.37	0.77	0.26	1.45e-05	0.0003		MIMAT0012835_st	miRNA-4_0
rno-miR-598-5p	20506544	4.11	2.71	0.4	0.67	0.19	9.05e-06	0.0002	microcosm	MIMAT0005324_st	miRNA-4_0
rno-mir-125b-1	20534984	4.25	3.5	0.9	1.41	0.21	0.0013	0.0051		MI0000896_x_st	miRNA-4_0
rno-miR-3594-5p	20517162	4.3	3.28	0.51	1.18	0.31	6.43e-05	0.0007		MIMAT0017898_st	miRNA-4_0
rno-miR-3584-5p	20517139	4.37	6.62	0.33	4.49	0.82	0.0003	0.0017		MIMAT0017875_st	miRNA-4_0
rno-miR-365-5p	20502380	4.43	3.44	0.8	1.3	0.3	0.001	0.0042		MIMAT0017184_st	miRNA-4_0
rno-miR-483-5p	20504146	4.49	4.12	0.29	1.95	0.35	3.39e-06	0.0001		MIMAT0017201_st	miRNA-4_0
rno-mir-26a	20534936	4.53	3.09	0.6	0.91	0.03	4.07e-05	0.0005		MI0000857_st	miRNA-4_0
rno-mir-9a-1	20534912	4.75	3.02	0.84	0.77	0.09	0.0004	0.0022		MI0000838_x_st	miRNA-4_0
rno-mir-764	20536076	4.87	2.99	0.18	0.71	0.09	7.59e-09	1.05e-06		MI0012616_st	miRNA-4_0
rno-mir-125b-1	20534983	4.93	3.34	0.91	1.04	0.21	0.001	0.004		MI0000896_st	miRNA-4_0
rno-mir-9a-1	20534911	5.04	3.15	0.78	0.81	0.15	0.0002	0.0014		MI0000838_st	miRNA-4_0
rno-miR-1199-5p	20522996	5.21	3.04	0.6	0.66	0.14	1.95e-05	0.0004		MIMAT0031125_st	miRNA-4_0
rno-miR-141-5p	20501466	5.25	3.01	0.67	0.62	0.21	6.01e-05	0.0007		MIMAT0017128_st	miRNA-4_0
rno-miR-877	20506489	5.27	4.6	0.27	2.2	0.34	1.09e-06	4.45e-05	microcosm	MIMAT0005285_st	miRNA-4_0
rno-miR-764-5p	20513760	5.59	3.1	0.76	0.62	0.09	9.38e-05	0.0009		MIMAT0012854_st	miRNA-4_0
---	20500946	5.84	3.74	0.27	1.19	0.08	5.09e-08	3.53e-06	microcosm; MTI	MIMAT0000561_st	miRNA-4_0
rno-miR-325-5p	20500938	5.88	3.47	0.7	0.91	0.11	4.65e-05	0.0006	microcosm	MIMAT0000557_st	miRNA-4_0
rno-miR-291a-3p	20501560	5.95	3.13	0.72	0.56	0.1	7.36e-05	0.0008	microcosm	MIMAT0000895_st	miRNA-4_0
rno-mir-6316	20537300	6.16	3.46	0.38	0.83	0.1	3.64e-07	1.68e-05		MI0021838_st	miRNA-4_0
rno-miR-664-1-5p	20504491	6.45	4.19	0.57	1.5	0.28	9.99e-06	0.0002		MIMAT0017228_st	miRNA-4_0
rno-mir-665	20536066	7.07	3.91	0.1	1.08	0.37	6.89e-08	4.31e-06		MI0012606_st	miRNA-4_0
rno-miR-139-3p	20501465	7.29	5.72	0.73	2.86	0.65	0.0001	0.0011	microcosm	MIMAT0004735_st	miRNA-4_0
rno-miR-194-3p	20501511	7.34	3.84	0.08	0.96	0.12	8.4e-11	6.23e-08		MIMAT0017148_st	miRNA-4_0
rno-miR-1188-5p	20517118	7.62	4.14	0.59	1.21	0.08	5.16e-06	0.0001		MIMAT0017854_st	miRNA-4_0
rno-miR-129-5p /// rno-miR-129-5p	20501011	8.94	4.04	1.39	0.88	0.09	0.0014	0.0051	microcosm; MTI	MIMAT0000600_st	miRNA-4_0
rno-miR-664-2-5p	20504493	10.02	6.66	0.91	3.33	0.34	0.0001	0.001		MIMAT0017229_st	miRNA-4_0
rno-miR-760-3p	20506562	11.03	4.46	0.89	1	0.18	2.57e-05	0.0004	microcosm	MIMAT0005337_st	miRNA-4_0
rno-miR-150-3p	20501479	11.41	4.88	0.32	1.36	0.12	2.04e-08	1.84e-06		MIMAT0017133_st	miRNA-4_0
rno-miR-99b-3p	20501416	11.93	5.57	0.68	1.99	0.74	3.16e-05	0.0004	microcosm	MIMAT0004725_st	miRNA-4_0
rno-miR-3473	20524321	12.57	11.91	0.27	8.26	1.04	7.82e-05	0.0008		MIMAT0024853_st	miRNA-4_0
rno-miR-678	20513765	13.5	4.78	0.08	1.03	0.31	2.82e-09	5.88e-07		MIMAT0012857_st	miRNA-4_0
rno-miR-493-3p	20504237	13.72	5.05	0.28	1.27	0.13	2.48e-09	5.88e-07	microcosm	MIMAT0003191_st	miRNA-4_0
rno-miR-1224	20513720	13.81	8.6	0.53	4.81	0.61	2.63e-06	8.65e-05		MIMAT0012827_st	miRNA-4_0
rno-miR-672-5p	20506547	14.2	7.82	0.49	3.99	0.79	6.78e-06	0.0002	microcosm; MTI	MIMAT0005327_st	miRNA-4_0
rno-miR-296-3p	20501564	14.55	5.27	0.15	1.41	0.4	1.54e-08	1.6e-06		MIMAT0004742_st	miRNA-4_0
rno-miR-496-5p	20513767	15.87	4.77	0.66	0.79	0.2	1.33e-06	4.9e-05		MIMAT0017372_st	miRNA-4_0
rno-miR-667-5p	20513757	19.26	5.58	0.43	1.32	0.49	3.77e-07	1.68e-05		MIMAT0017369_st	miRNA-4_0
rno-miR-328a-5p	20500949	21.22	9.8	0.12	5.39	0.47	1.12e-08	1.27e-06		MIMAT0017029_st	miRNA-4_0
rno-miR-3562	20517096	23.06	6.18	0.48	1.65	0.3	4.55e-08	3.45e-06		MIMAT0017832_st	miRNA-4_0
rno-miR-1306-3p	20524320	23.83	6.2	0.58	1.62	0.27	1.91e-07	1.04e-05		MIMAT0024852_st	miRNA-4_0
rno-miR-346	20501006	26.38	5.82	0.23	1.1	0.58	8.59e-08	5.1e-06	microcosm	MIMAT0000596_st	miRNA-4_0
rno-miR-652-5p	20506571	29.79	6.06	0.29	1.17	0.52	3.6e-08	3e-06		MIMAT0017321_st	miRNA-4_0
rno-miR-326-5p	20500944	32.97	6.15	0.29	1.11	0.39	8.91e-09	1.11e-06		MIMAT0017028_st	miRNA-4_0
rno-miR-195-3p	20501513	33.44	6.15	0.34	1.08	0.33	6.79e-09	1.05e-06		MIMAT0017149_st	miRNA-4_0
rno-miR-702-5p	20517148	34.08	6.71	0.45	1.62	1.13	1.56e-05	0.0003		MIMAT0017884_st	miRNA-4_0
rno-miR-32-3p	20501395	55.86	7.2	0.68	1.4	0.13	5.9e-08	3.88e-06		MIMAT0017103_st	miRNA-4_0
rno-miR-465-5p	20513753	59.38	6.88	0.46	0.99	0.28	6.05e-09	1.05e-06		MIMAT0012850_st	miRNA-4_0
rno-miR-466d	20517088	92.77	7.47	0.88	0.94	0.33	2.81e-07	1.47e-05		MIMAT0017824_st	miRNA-4_0
rno-miR-466c-5p	20506479	121.18	7.9	0.7	0.98	0.2	2.06e-08	1.84e-06	microcosm	MIMAT0005279_st	miRNA-4_0
rno-miR-466b-5p /// rno-miR-466b-5p	20506476	122.4	7.82	0.63	0.89	0.61	8.98e-08	5.1e-06	microcosm	MIMAT0005278_st	miRNA-4_0
rno-miR-297	20501565	187.25	8.86	0.56	1.32	0.2	2.25e-09	5.88e-07	microcosm	MIMAT0000899_st	miRNA-4_0
rno-miR-92b-5p	20506567	241.18	9.19	0.43	1.28	1.5	2.39e-06	8.06e-05		MIMAT0017319_st	miRNA-4_0
