# Supplementary material for: A miRNome analysis at the early postmortem interval
Source: PeerJ. 2023 Jun 7;11:e15409. doi: 10.7717/peerj.15409 (PMC10257396; doi:10.7717/peerj.15409)
Supplement: Supplemental Information 7 [file peerj-11-15409-s007.xlsx]

## Sheet: Targets
miRNAs
Down-Regulated	Targets
rno-miR-125b-5p/rno-miR-351-5p	0610010F05Rik	2610528J11Rik	6030458C11Rik	A330008L17Rik	Abhd3	Abhd6	Abtb1	Acer2	Arid3a	Arid3b	Atp5g2	AU019823	AU040320	Bak1	Bap1	Blzf1	Bmf	Ccnj	Cdh5	Cgn	Chtf8	Cln6	Coro2a	Crb2	Ctdsp2	D17H6S53E	Daam1	Dennd6a	Dis3l2	Dock3	Dram2	Dtx4	Dus1l	Eaf1	Eif1ad	Enpep	Entpd4	Esrra	Eva1a	Fam118a	Fam73a	Fam83h	Fbxw4	Fut1	Galnt14	Galnt5	Gjc1	Glb1l2	Grb10
rno-miR-138-5p	Ahcyl2	Ammecr1	Arhgap42	Arhgef3	Arl5b	AU019823	Bnip3l	Casp3	Ccdc85c	Cdr2l	Celf5	Clmp	Cln5	Clns1a	Clock	Clvs1	Cnot8	Corin	Ctdspl2	Dcp1a	Dcun1d4	Dek	Dennd1a	Efhd2	Emb	En2	Epha8	Eri1	Ezh2	Fam210b	Fbxo41	Fbxo46	Fem1c	Fermt2	Foxp4	Gatad2a	Gatsl2	Glcci1	Gpr135	Hspa4l	Iglon5	Ina	Ing1	Iqsec1	Jazf1	Josd1	Kbtbd4	Kdm6b	Klf11
rno-miR-92a-3p	Aars	Adam23	Ankrd44	Armc1	Arrdc3	Bcat2	Bsdc1	Btg2	Cbln4	Ccnc	Ccnjl	Cd69	Chka	Cnep1r1	Cpeb2	Cpeb3	Cpeb4	Dcaf6	Dkk3	Dnajb9	Dnajc4	Dus2	Dusp5	Dyrk2	Ergic2	Evx2	Fam135a	Fam19a1	Fbxw7	Fnip1	G3bp2	Glra1	Golga4	Gpr180	Grhl1	Hand1	Hand2	Herpud2	Hipk3	Isca1	Itgav	Klf2	Klf4	Klhl14	Lhfpl2	Lurap1l	Man2a1	Map2k4	Myo1b
rno-miR-133a-3p/rno-miR-133b-3p	3110018I06Rik	4930402H24Rik	Actn4	Ankrd28	Ankrd44	Arfip2	Bcorl1	Bicc1	Capn5	Cdk13	Celf1	Celf4	Cers2	Clta	Cmpk1	Cnn2	Dcbld1	Dolpp1	Efna4	Eif4a1	Elavl1	Elfn1	Exd2	Fam160b1	Fam46a	Fam57a	Fbxl19	Fgf1	Fgfr1	Foxc1	Gabarapl1	Gabpb2	Gdnf	Glra2	Lancl2	Lasp1	Ldlrap1	Lhfp	Lhx5	Lrrfip1	Maml1	Mecom	Mfsd7b	Mmgt1	Msn	N28178	Nags	Ndrg1	Pan3
rno-miR-93-5p	1500011K16Rik	2210018M11Rik	Arhgap12	Arid4b	Atg16l1	BC037034	Bhlhe41	Brms1l	Btg3	Camk2n1	Cd274	Cd69	Cdc37l1	Cercam	Clip4	Clock	Cnot7	Crot	Ddhd1	Derl2	Dusp2	Dync1li2	E2f5	Epha4	Fam45a	Fbxl5	Fbxo48	Fjx1	Ginm1	Gpr137c	Gpr6	Hn1	Il25	Kif23	Kmt2b	Lima1	Map3k2	March8	Mastl	Mfap3l	Myt1l	Naa30	Nabp1	Nanos1	Nr4a3	Nup35	Pfn2	Plekha3	Ppp3r1
rno-miR-22-3p	4930523C07Rik	Ankrd13a	Ankrd52	Arfip2	Arrb1	Batf3	Brwd3	Btg1	Cav3	Cenpv	Chd9	Ciita	Cpeb1	Cyhr1	Cyth3	Ddit4	Dpy30	Edc3	Eif4ebp2	Eif4ebp3	Elovl6	Epb4.1l2	Esr1	Fam168b	Fam49b	Fbn2	Fbxl19	Fbxo46	Frat2	Gatm	Grm5	H3f3b	Hif1an	Ikzf4	Irf5	Kdm3a	Kirrel3	Klf6	Lgals1	Lin7c	Mat2a	Mecp2	Msl2	Mthfr	Naa20	Ncmap	Net1	Odf1	Ogn
rno-miR-26b-5p	Aspn	Atf2	Bmp2k	Bod1	Ccnj	Cdk8	Chac1	Chfr	Cks2	Cox5a	Dyrk1a	Epc2	Ezh2	Fam98a	Fbxl19	Fgd1	Ghsr	Gmds	Gnpnat1	Grhl3	Hgf	Hmga1	Hoxa5	Hpgd	Ippk	Kpna2	Lnp	Lsm12	Mab21l1	Msantd1	Mtx2	Mxi1	Nab1	Nabp1	Nap1l5	Osbpl11	Palm3	Pawr	Pdcd10	Pfkfb3	Prkcd	Pten	Rgs4	Slc38a2	Smad1	Snn	Srp19	St6gal2	Stradb
rno-miR-181c-5p/rno-miR-181d-5p	Atp1b1	Chic1	Cpeb4	Cpne2	Dcun1d1	E2f5	Esm1	Gabra1	Gata6	Gm3055	Gskip	Hsp90b1	Il1a	Ippk	Klf6	Klhl2	Lmo3	Msantd3	Osbpl3	Phip	Plekhj1	Rlf	Rnf34	Rorb	Slitrk1	Sowaha	Tcerg1	Tnfrsf11b	Zfp36l1	Zfp820	Zfp850
rno-miR-221-3p/rno-miR-222-3p	2510009E07Rik	Arf4	Btg2	Ccdc64	Cdkn1b	Dcun1d4	Dmrt3	Eif3j1	Etv3	Fam214a	Fos	Hectd2	Irf2	Kit	Megf9	Mex3a	Midn	Mylip	Ntf3	Paip2	Ppp3r1	Qk	Rfx7	Sesn3	Tmcc1	Zfp385a
rno-miR-140-5p	Dlgap1	Egr2	Elavl2	Epb4.1l2	Fgf9	Fxr1	Gpr161	Igfbp5	Katnbl1	Msmp	Ncstn	Nfe2l2	Nog	Numbl	Pdgfra	Rala	Sec22c	Sept2	Smox	Snx2	Timm23	Wnt11	Wnt9a	Zfp800
rno-miR-191a-5p	Cebpb	Iffo2	Mapre3	Neurl4	Rnf139	Setd1b	Wiz
rno-miR-455-3p	Cul3	Maf
Up-regulated
rno-miR-291a-3p	Arid4b	Barx2	Btg1	Calm1	Cdkn1a	Clip4	Clock	Cux1	Dazap2	Dcaf6	Dmrt1	E2f2	Ednrb	Elavl2	Fgf16	Gdf11	Hn1	Josd1	Lats2	Lcor	Lefty2	Lgr4	Lin52	Ncoa7	Nfib	Nr2c2	Plag1	Ppp3r1	Ppp6c	Prdm8	Ptpn4	Rab22a	Samd12	Sdc1	Suv39h1	Tgfbr2	Tlx1	Trp53inp1	Ube2b	Wdr37	Yod1	Zfp367	Zfp661	Zfp800
[truncated: 81 more columns]
